# Supplementary material for: Topology and porosity modulation of polyurea films using interfacial polymerization
Source: Royal Society of Chemistry journal article supplement (doi:10.1039/c5ra27108h), 2016-01-01
Supplement: c5ra27108h1.pdf [file c5ra27108h1.pdf]

## Topology and porosity modulation of polyurea films using interfacial polymerization

Roshan DSouza, Deepa Sriramulu and Suresh Valiyaveetil\*

### Supporting information

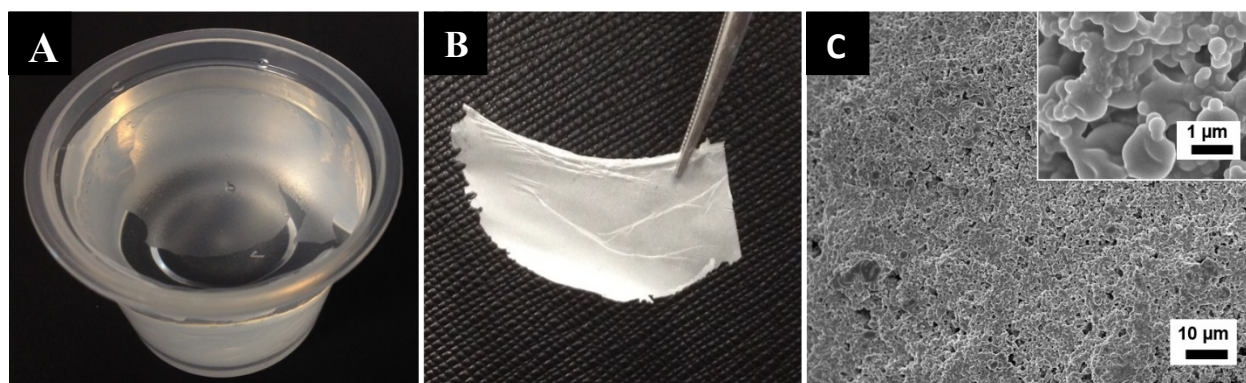

**Figure S1.** (A) Thin film at the interface and (B) free-standing DETA/HMDI film after drying (C) FESEM image of solid PU prepared by solution phase reaction of amine (DETA) and diisocyanate (HMDI) in THF.

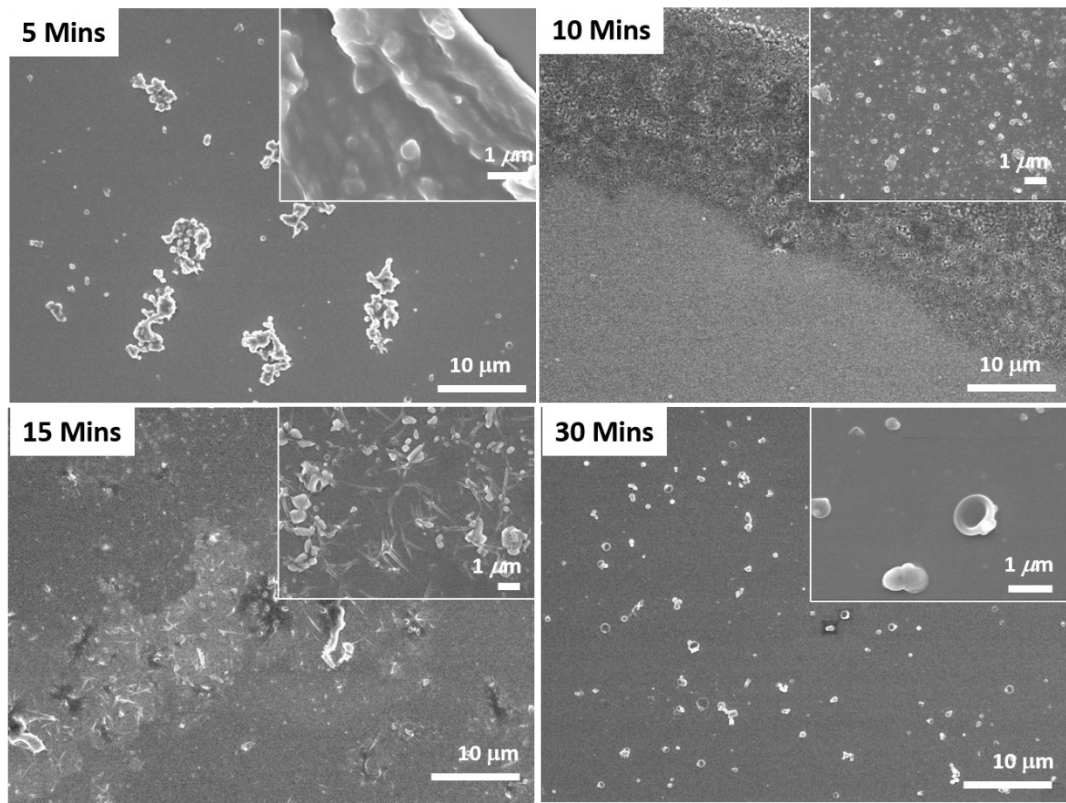

**Figure S2.** FESEM images of the DETA-HMDI polyurea film at different time intervals. Insets show magnified images.

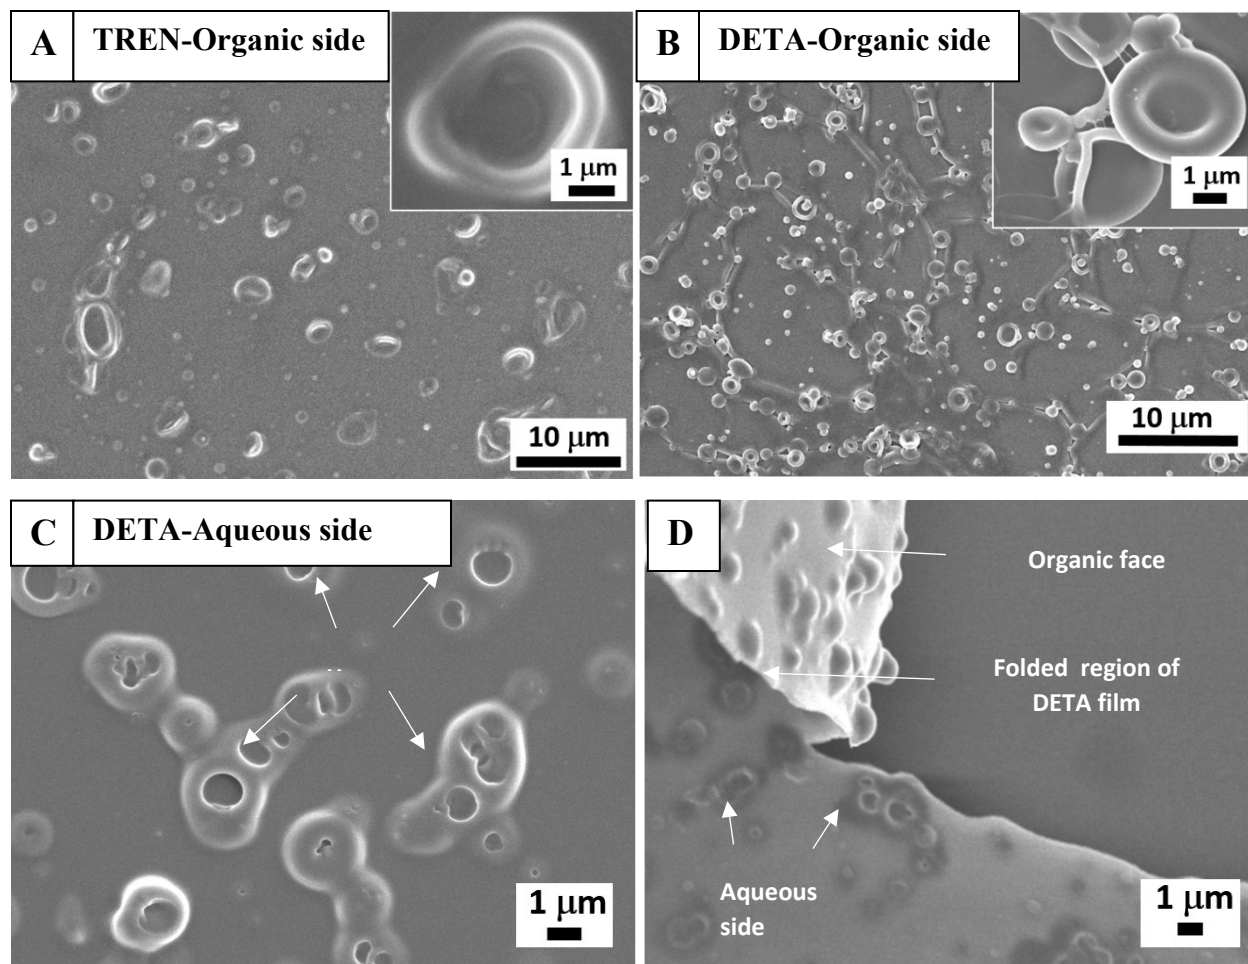

**Figure S3.** FESEM images of (A) organic side of TREN/HMDI film, (B) organic and (C) aqueous sides of DETA/HMDI films. (D) A folded end of DETA film showing both organic and aqueous faces of the films.

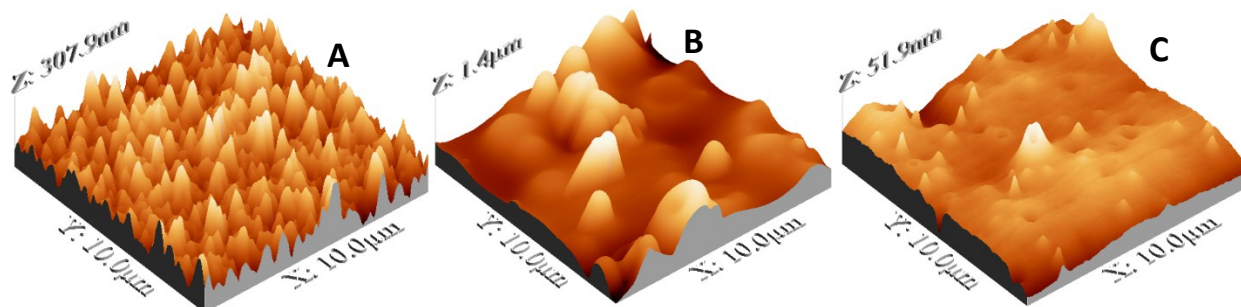

**Figure S4.** 3D view AFM micrographs of PU films corresponding to the height images in Figure 3. (A) Organic side of PEI/HMDI film; (B) organic side of DETA/HMDI film and (C) aqueous face of DETA/HMDI film.

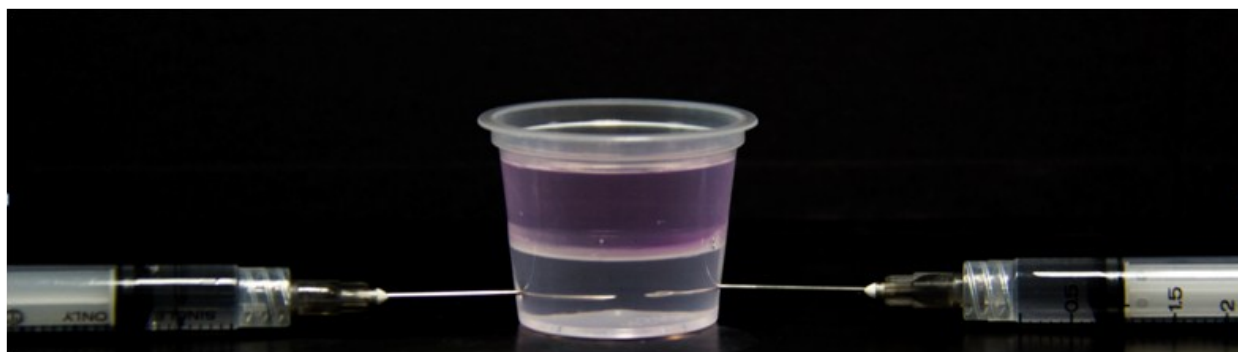

**Figure S5.** Photo representing a home-made arrangement of introducing reagents at the bottom phase without disturbing the film at the interface. Similar volumes are injected and removed at the same time.

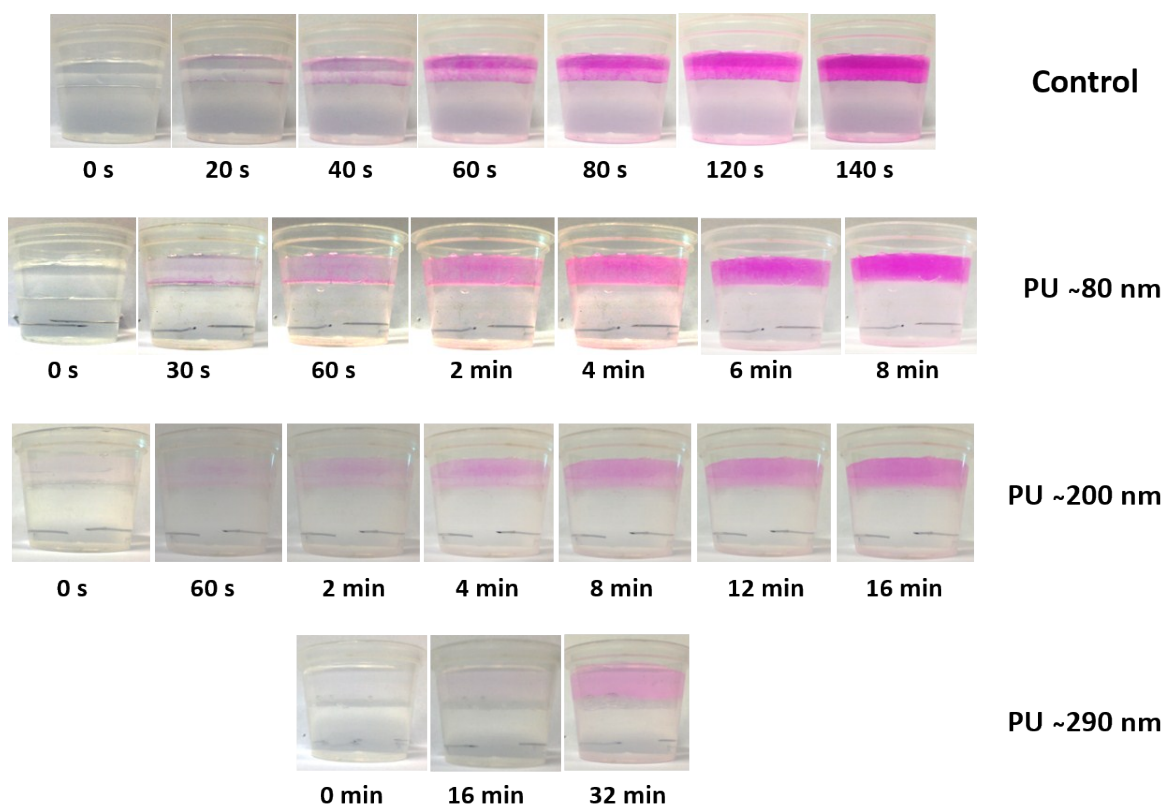

**Figure S6.** Transport of Phenolphthalein through the polyurea membrane with average thickness 80, 200 and 290 nm, respectively, at different time intervals. Control experiment was done without PU film.

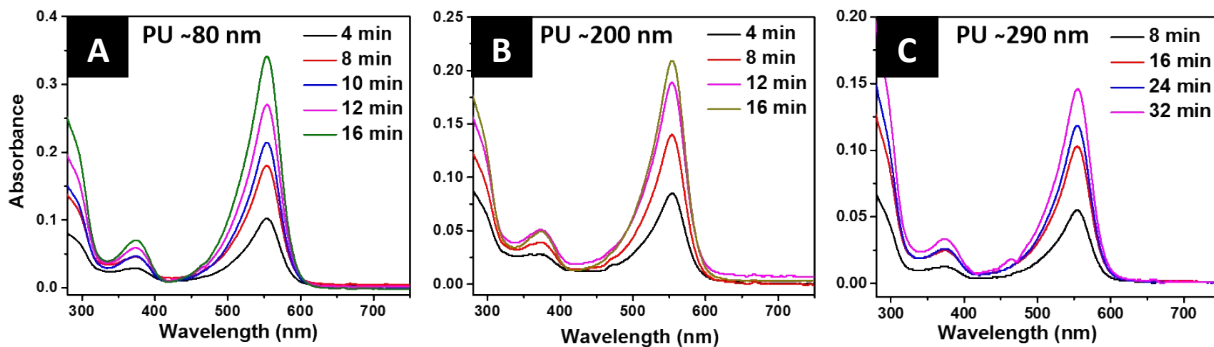

**Figure S7.** UV-Vis spectra of aqueous layers at different time intervals containing phenolphthalein diffused through PU films with average thickness of (A) 80 nm (B) 200 nm and (C) 290 nm.

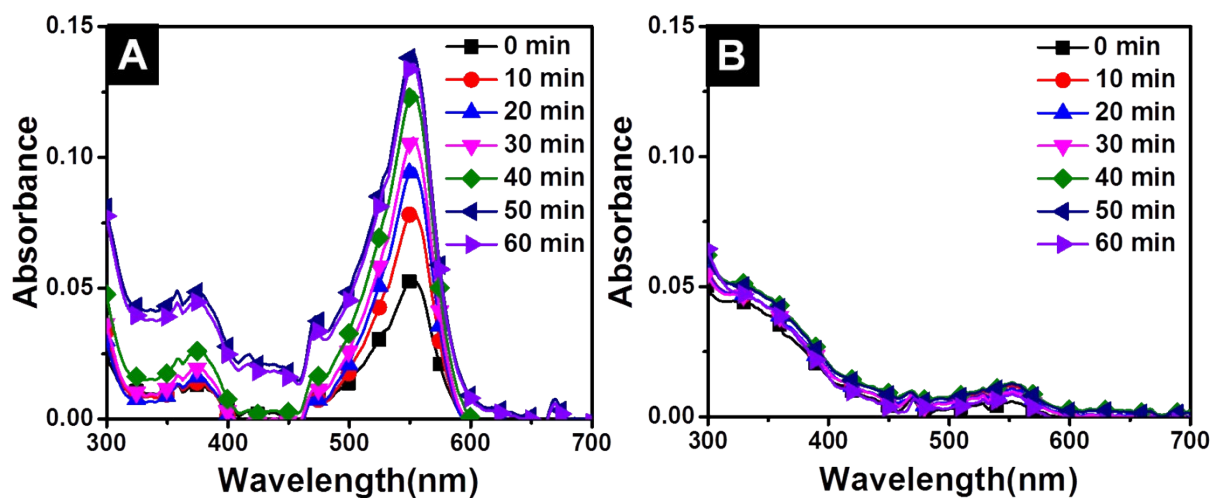

**Figure S8.** UV-Vis spectra of aqueous layers at different time intervals containing phenolphthalein diffused through DETA films with average thickness of (A) 50 nm (1 hr) and (B) 120 nm (24 hr).
